# Supplementary material for: Thermodynamics of hybrid manganese formate perovskites
Source: Royal Society of Chemistry journal article supplement (doi:10.1039/d4ra03700f), 2024-01-01
Supplement: d4ra03700f1.pdf [file d4ra03700f1.pdf]

## Electronic Supplementary Information

### Thermodynamics of Hybrid Manganese Formate Perovskites

Novendra Novendra<sup>a</sup>, G.P. Nagabhushana<sup>a,b</sup>, and Alexandra Navrotsky<sup>a,c</sup>

<sup>a</sup> Peter A. Rock Thermochemistry Laboratory and NEAT ORU, University of California Davis, Davis CA 95616 USA

<sup>b</sup> Department of Chemistry, PES University, Bangalore, India

<sup>c</sup> School of Molecular Sciences and Center for Materials of the Universe, Arizona State University, Tempe AZ 85287 USA

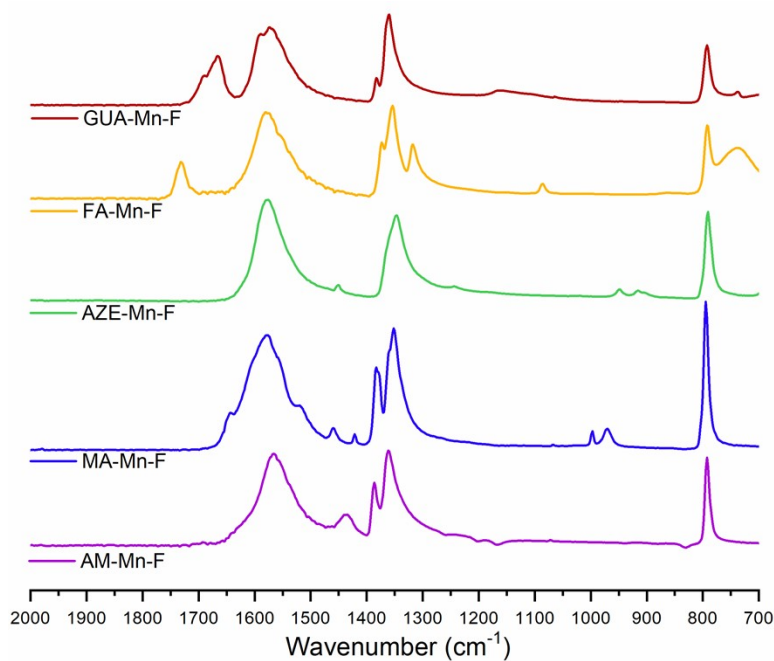

Fig. S1 FTIR patterns of all AH<sup>+</sup>-Mn-F samples

**Table S1** IR absorption bands (cm<sup>-1</sup>) and their assignments for all AH<sup>+</sup>-Mn-F samples

| Assignments                      | AM-Mn-F  | MA-Mn-F   | AZE-Mn-F  | FA-Mn-F   | GUA-Mn-F  |
|----------------------------------|----------|-----------|-----------|-----------|-----------|
| $\delta_{as}(\text{NH}_2)$       |          |           |           | 1732 (s)  | 1689 (sh) |
|                                  |          | 1640 (sh) |           |           | 1666 (s)  |
| $\nu_4$ OCO stretch, asym        | 1566 (s) | 1577 (s)  | 1576 (s)  | 1580 (s)  | 1589 (sh) |
|                                  |          | 1520 (sh) |           |           | 1574 (s)  |
| $\nu(-\text{CH}_2-)$             |          | 1460 (w)  | 1450 (w)  |           |           |
| $\nu_4(\text{NH}_4^+)$           | 1435 (m) |           |           |           |           |
| $\nu_5$ OCO deformation, asym    | 1387 (s) | 1382 (s)  |           | 1373 (sh) | 1382 (m)  |
| $\nu_2$ OCO stretch, sym         | 1362 (s) | 1352 (s)  | 1346 (s)  | 1354 (s)  | 1360 (s)  |
| $\rho(\text{NH}_2)$              |          |           |           | 1317 (s)  |           |
| $\nu(\text{C}-\text{N})$         |          |           | 1245 (vw) |           | 1163 (w)  |
| $\rho(\text{NH}_2)$              |          |           |           | 1086 (s)  |           |
| $\nu_6$ out-of-plane deformation |          | 970 (w)   | 950 (w)   |           |           |
|                                  |          |           | 916 (w)   |           |           |
| $\nu_3$ OCO deformation, sym     | 793 (s)  | 795 (s)   | 791 (s)   | 793 (s)   | 793 (s)   |
| $\omega(\text{NH}_2)$            |          |           |           | 736 (b)   |           |
| $\rho_r(\text{NH}_2)$            |          |           |           |           | 737 (w)   |
